# Supplementary material
Source: Springer Nature journal article supplement (https://www.springermedizin.de/resource/supplementary/13019_2012_756_MOESM3_ESM.pdf/9639040)

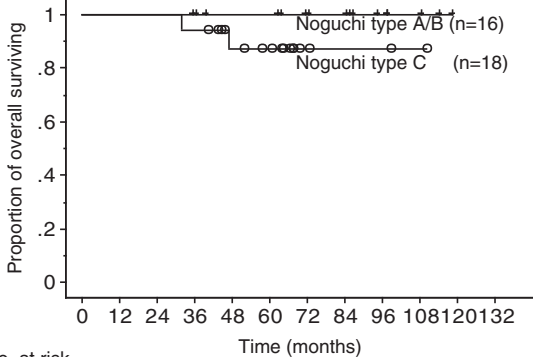

No. at risk

Type A/B

16 16 16 15 13 13 10 9 5 3 0

Type C

18 18 18 17 12 10 3 2 2 1 0

Supplement: MOESM3 [file 9639040]
